# Supplementary material for: Dendropanax morbiferus leaf extract facilitates oligodendrocyte development
Source: PubMed Central journal article supplement (PMC6599778; doi:10.1098/rsos.190266), 2019-06-26

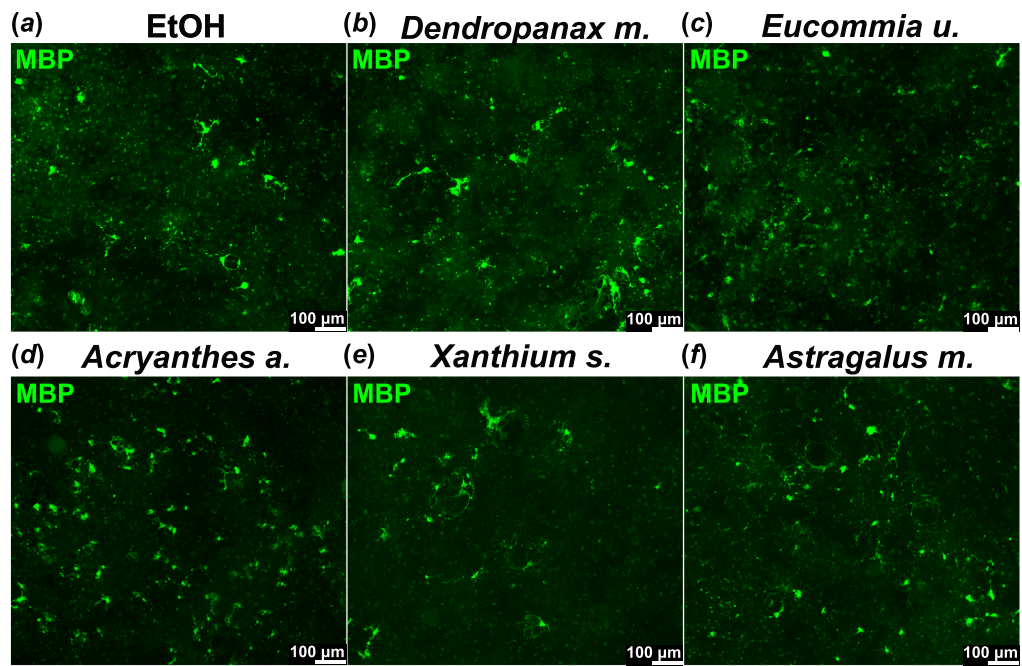

Supplement: rsos190266supp2.pdf [file rsos190266supp2.pdf]
